# Supplementary material for: Understanding Reduced Rotavirus Vaccine Efficacy in Low Socio-Economic Settings
Source: PubMed Central journal article supplement (PMC3412858; doi:10.1371/journal.pone.0041720), 2012-08-06

Figure S1. Model structure. Figure (A) shows the original transmission model by Atchison et al <sup>S1</sup> and (B) illustrates how vaccination was included in the current analysis.

(A) Transmission model

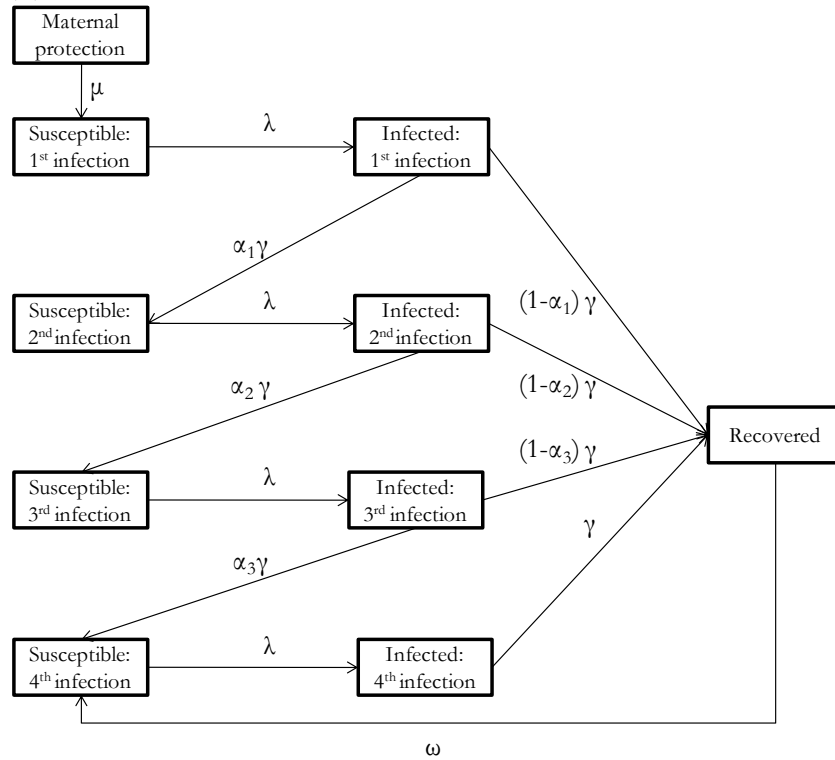

(B) Model including vaccination

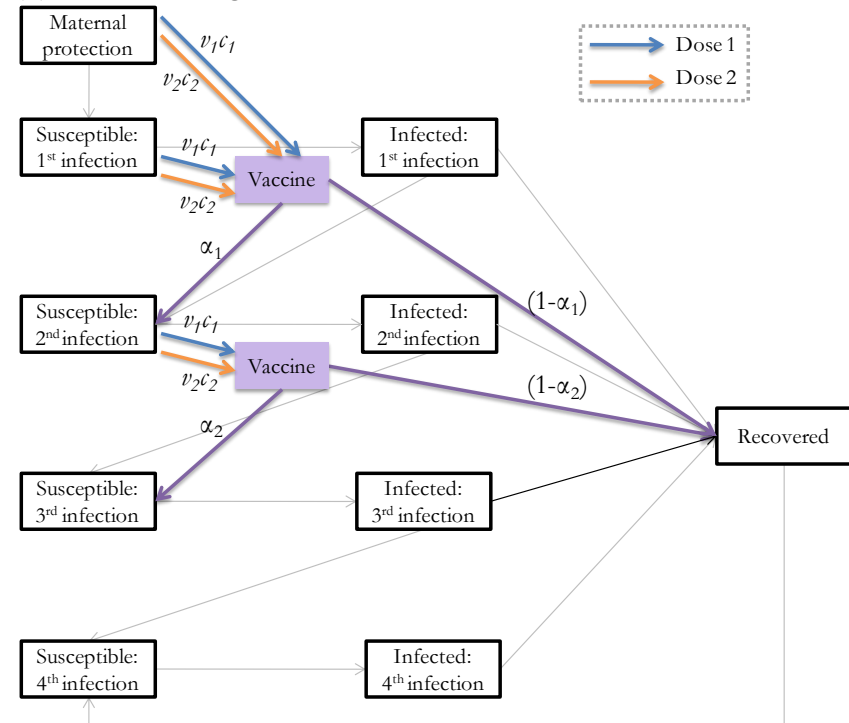

Supplement: pone.0041720.s002.pdf [file pone.0041720.s002.pdf]
