# Supplementary material for: Understanding Reduced Rotavirus Vaccine Efficacy in Low Socio-Economic Settings
Source: PubMed Central journal article supplement (PMC3412858; doi:10.1371/journal.pone.0041720), 2012-08-06

**Figure S3.** Predicted vaccine efficacy for severe rotavirus gastroenteritis incidence in 0 to 4 year-olds. Stepwise influence of improving the underlying natural history of protection, disease incidence and immunogenicity of vaccination.

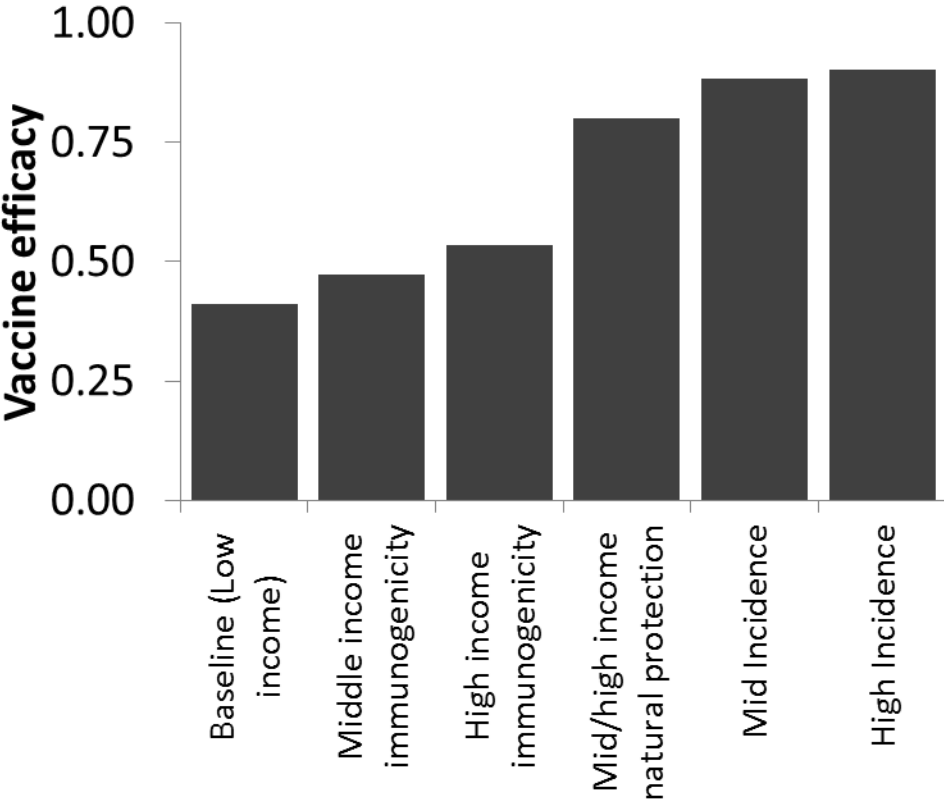

Supplement: pone.0041720.s004.pdf [file pone.0041720.s004.pdf]
